# Supplementary material for: Evidence of cAMP involvement in cellobiohydrolase expression and secretion by Trichoderma reesei in presence of the inducer sophorose
Source: PubMed Central journal article supplement (PMC4590280; doi:10.1186/s12866-015-0536-z), 2015-09-30
Supplement: 12866_2015_536_MOESM1_ESM.pdf [file 12866_2015_536_MOESM1_ESM.pdf]

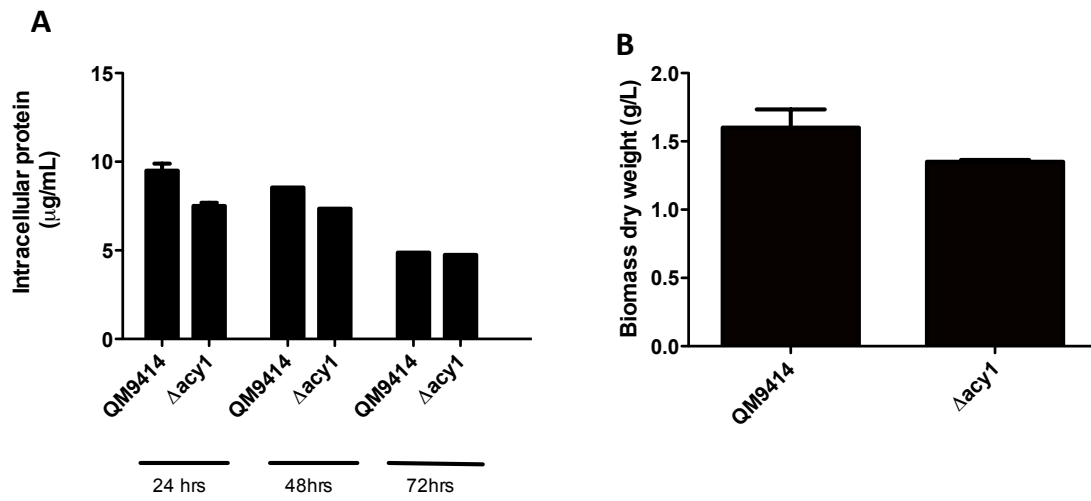

**Additional file 1.** Growth profiles of *T. reesei*, QM9414 and  $\Delta$ acy1 in cellulose (A) and glycerol (B) as carbon source. Error bars are represented from three biological replicates. . No significant difference was showed in growth between  $\Delta$ acy1 mutant strain and the parental QM9414
